# Supplementary material for: Identification and validation of the angiogenic genes for constructing diagnostic, prognostic, and recurrence models for hepatocellular carcinoma
Source: publisher site journal article supplement (doi:10.18632/aging.103107), 2020-05-06
Supplement: Supplementary file [file aging-v12i9-103107-supplementary-material-SD1.pdf]

**SUPPLEMENTARY FIGURES**

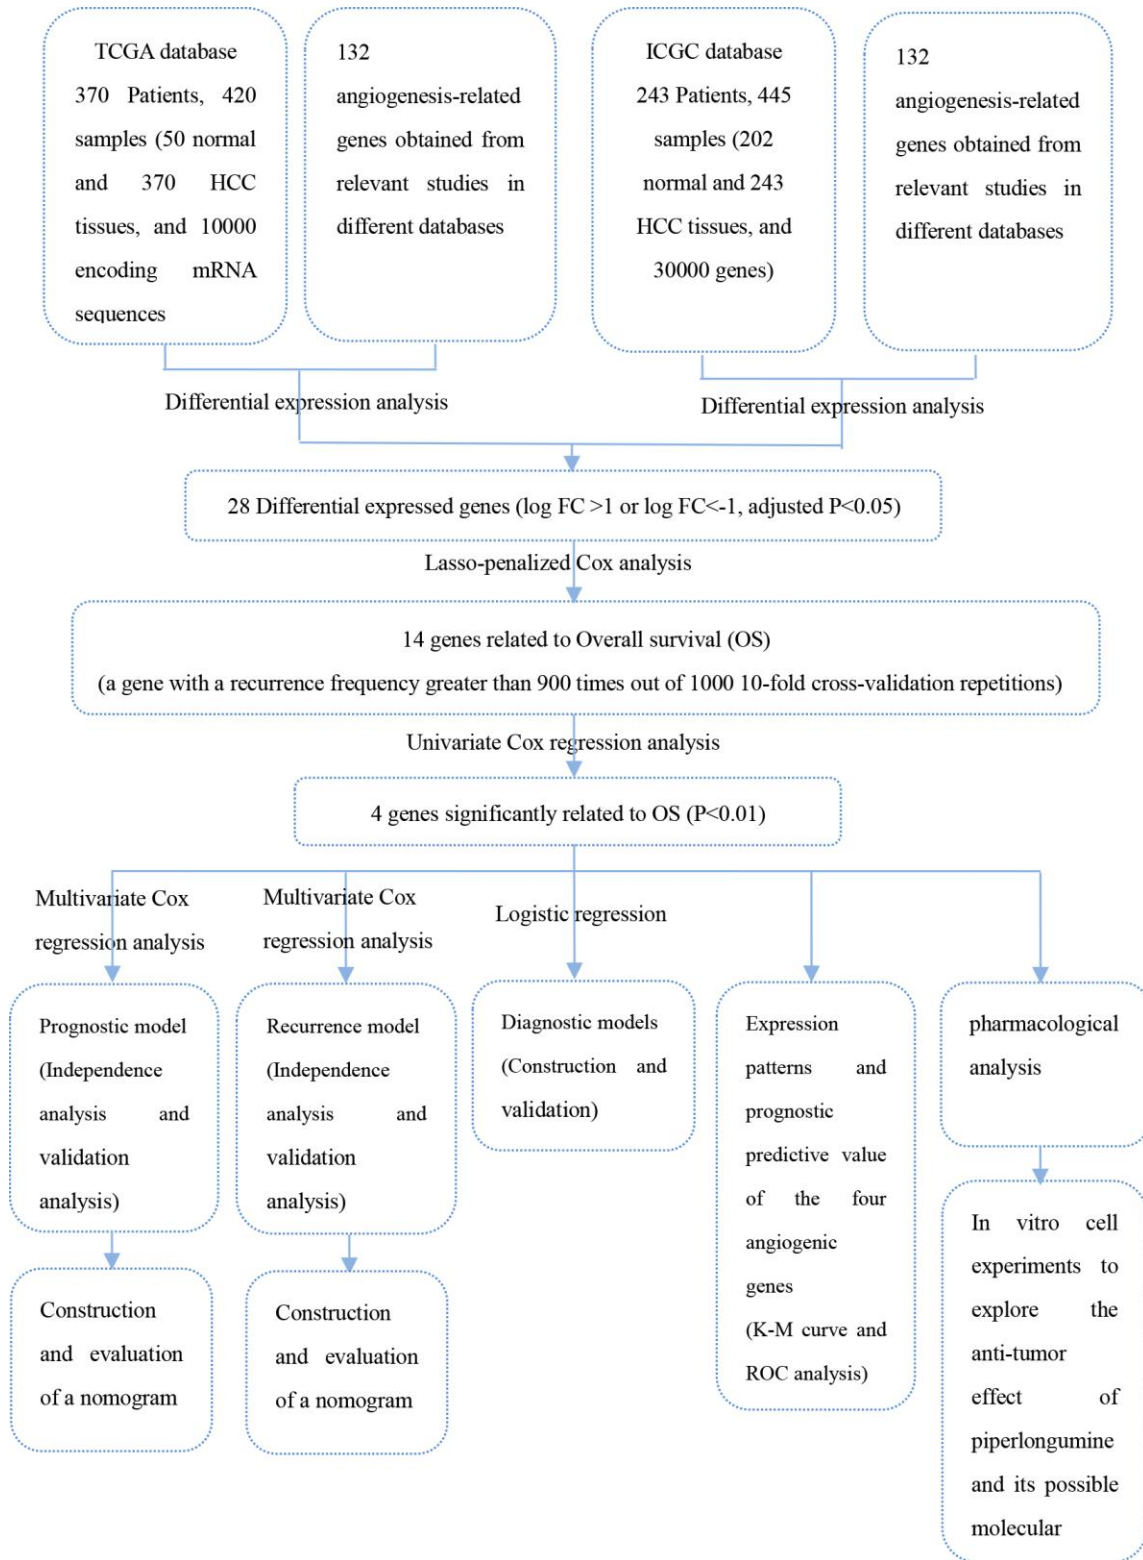

**Supplementary Figure 1. An overall flow chart explaining to identify the angiogenic genes for constructing diagnostic, prognostic, and recurrence models in hepatocellular carcinoma.**

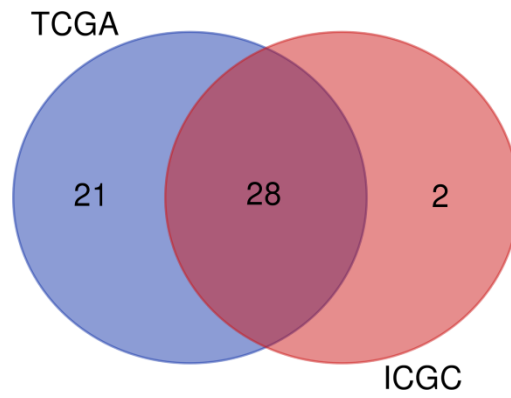

**Supplementary Figure 2. Commonly differentially expressed angiogenic genes in TCGA and ICGC databases.**

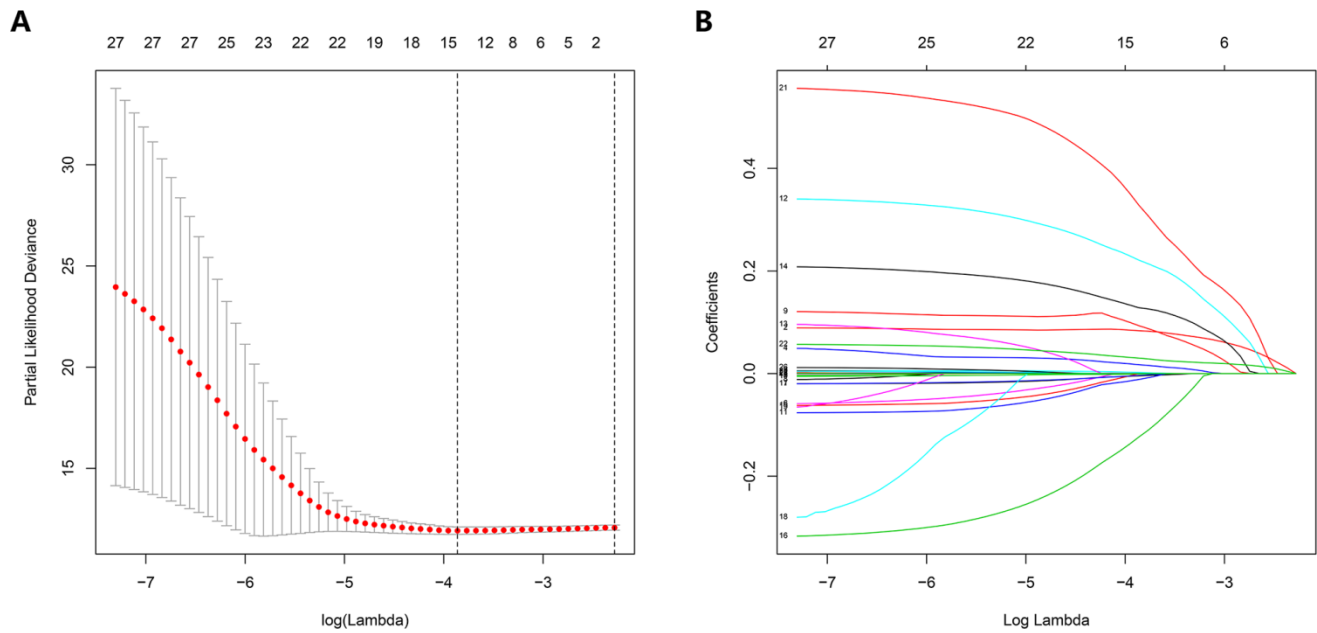

**Supplementary Figure 3. Identification of key angiogenic genes closely associated with prognosis of HCC.** LASSO Cox regression (A, B) were performed to identify the angiogenic genes closely related to OS of HCC.

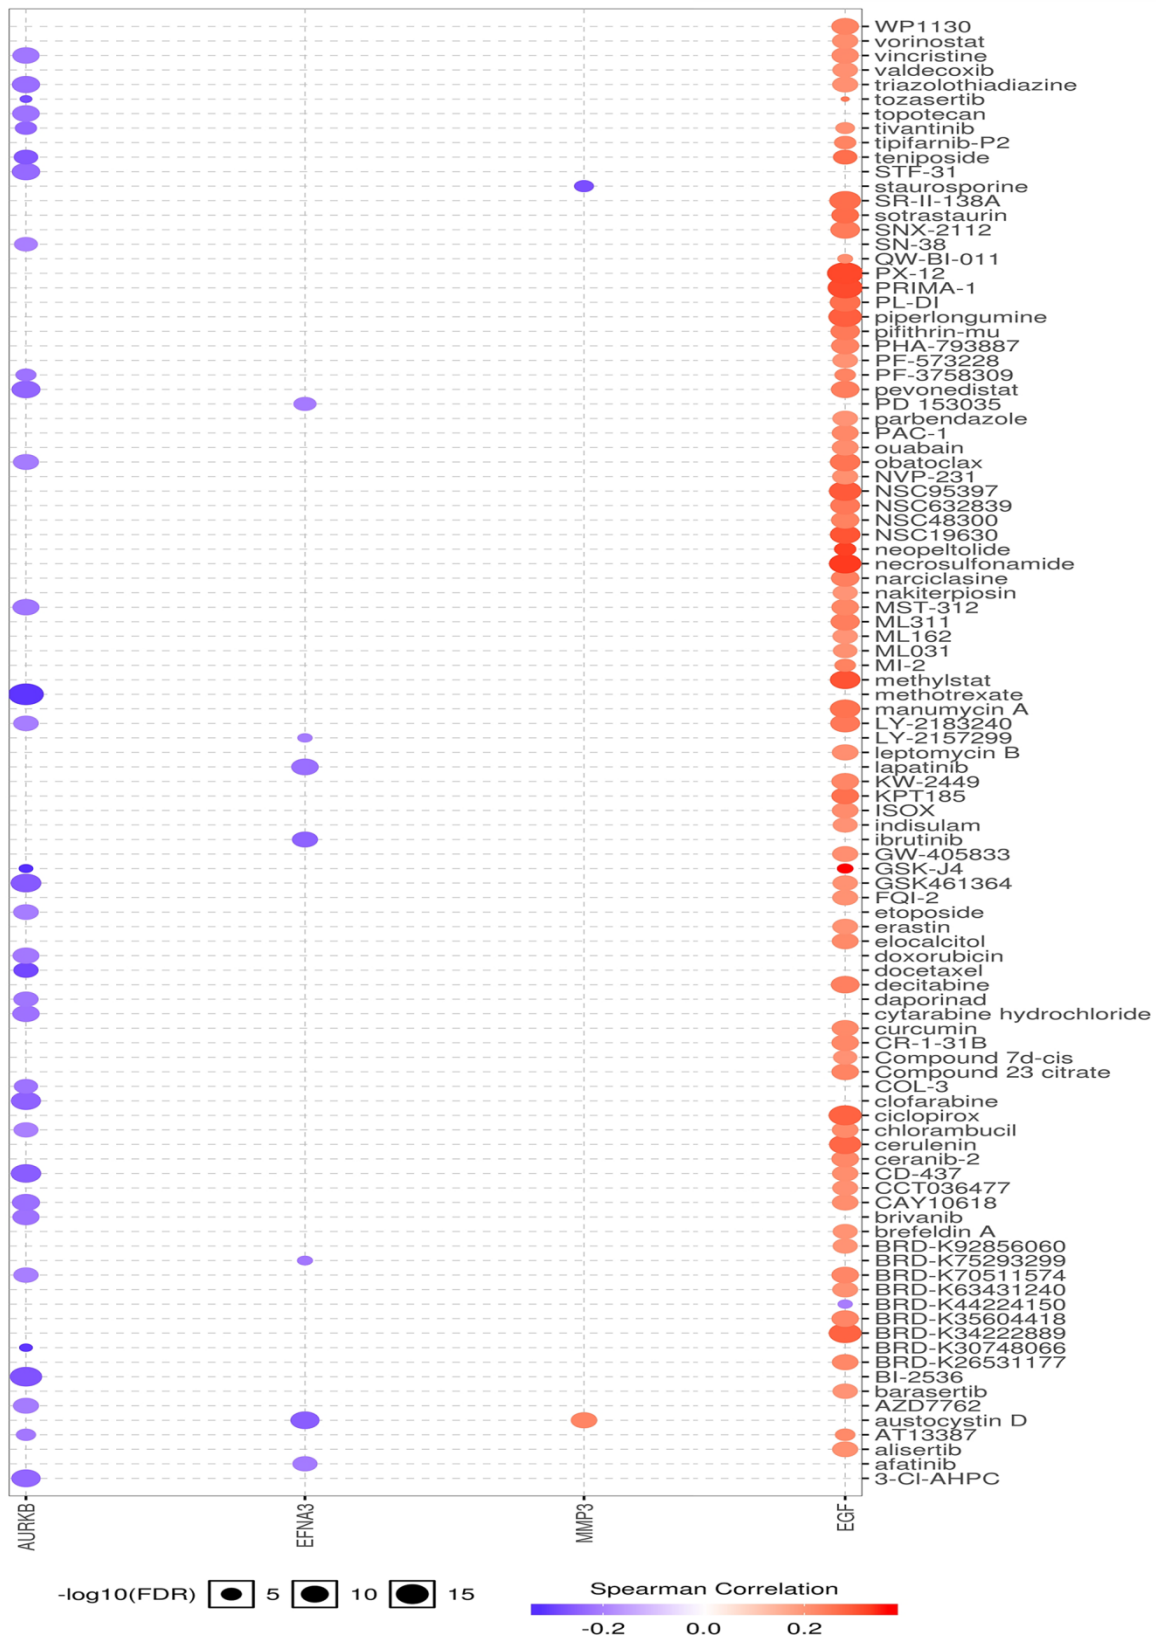

**Supplementary Figure 4. Inhibitors of the angiogenic genes.** Data was obtained from the Cancer Therapeutics Response Portal (CTRP) database (<http://portals.broadinstitute.org/ctrp/>).

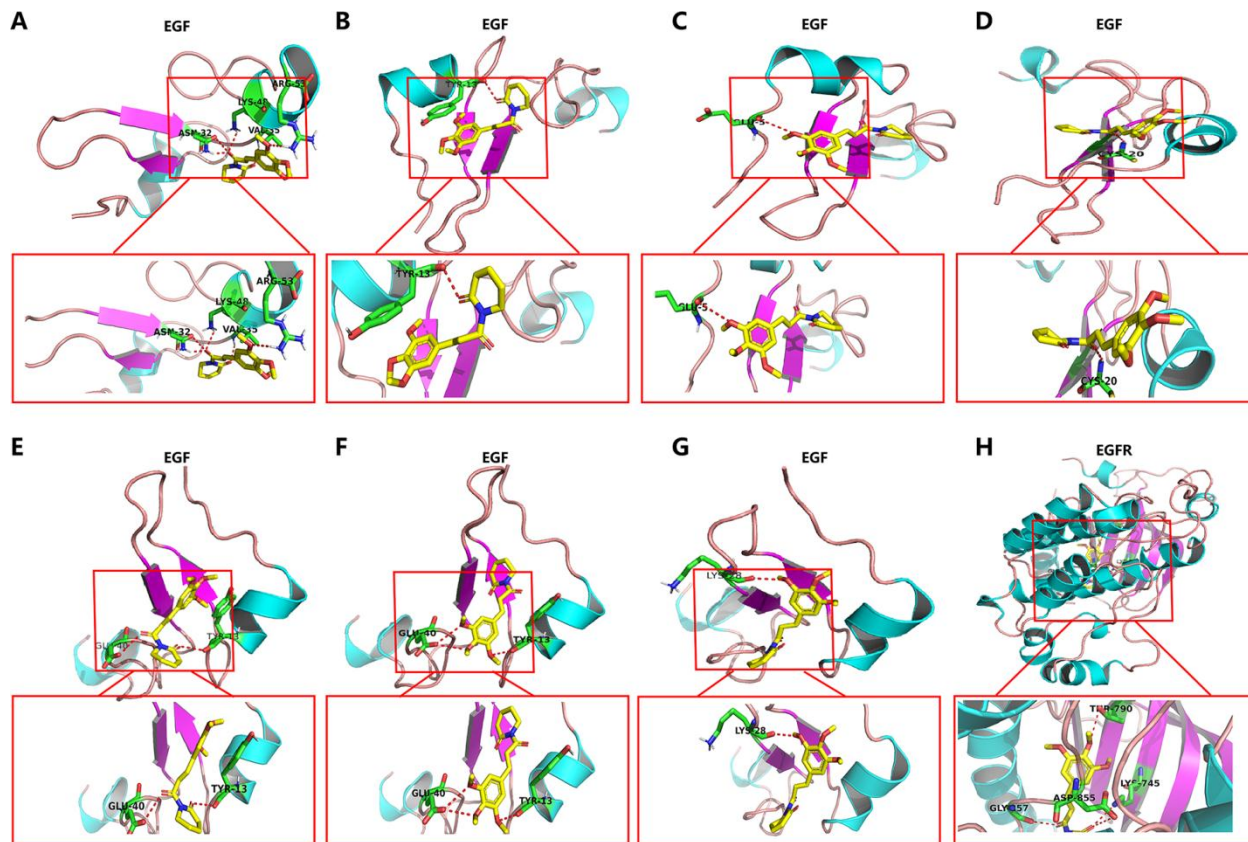

**Supplementary Figure 5. Molecular docking for targeted drug identification.** Specific binding sites of piperlongumine to EGF (A–G) and EGFR (H).
